# Supplementary material for: Like stars falling down from the sky: resins effectively assist in and facilitate centrifugal separation and recycling of tiny microbial cells
Source: Royal Society of Chemistry journal article supplement (doi:10.1039/d3gc00909b), 2023-01-01
Supplement: d3gc00909b1.pdf [file d3gc00909b1.pdf]

## Supplementary

| Resin                    | XAD-16N            | Anion resin                  |                     | Cation resin        |                     |
|--------------------------|--------------------|------------------------------|---------------------|---------------------|---------------------|
|                          |                    | Gel type-335                 | Macroreticular-D315 | Gel type-JK110      | Macroreticular-HD-1 |
| Framework                | styryl             | epikote                      | acrylic polymers    | acrylic polymers    | phenolic            |
| Functional groups        | -                  | -NH <sub>2</sub> , =N,<br>≡N | ≡N                  | -COO-               | -COO-               |
| Water content (%)        | 62-70              | 60-70                        | 47-57               | 70-80               | 62-72               |
| Particle size range (mm) | 0.30-1.18 ≥<br>92% | 0.315-1.25 ≥<br>90%          | 0.315-1.2 ≥ 95%     | 0.315-1.25 ≥<br>90% | 0.315-1.25 ≥<br>90% |

**Table 1.** Classification and characteristics of resins
